# Supplementary material for: Impact of Behavioral Health Homes on Cost and Utilization Outcomes
Source: Atypon-hosted journal article supplement (doi:10.1176/appi.ps.201900141), 2020-04-28
Supplement: appi.ps.201900141.ds001.pdf [file appi.ps.201900141.ds001.pdf]

**Analysis of covariance of utilization and cost outcome between treatment and control groups with  
baseline outcome adjusted**

|                               |                           |             |    |         | Control | Treatment | Diff. | p      | Diff. % |
|-------------------------------|---------------------------|-------------|----|---------|---------|-----------|-------|--------|---------|
| <b>Total</b>                  | <b>Self-directed</b>      | Penetration | Y1 | .930    | .971    | .040      | .000  | 4.3%   |         |
|                               |                           | Rate        | Y2 | .910    | .936    | .027      | .012  | 2.9%   |         |
|                               |                           | PMPM        | Y1 | \$1,724 | \$1,482 | -\$243    | .118  | -14.1% |         |
|                               |                           | Expenditure | Y2 | \$1,890 | \$1,391 | -\$498    | .020  | -26.4% |         |
|                               | <b>Provider-supported</b> | Penetration | Y1 | .903    | .964    | .061      | .000  | 6.8%   |         |
|                               |                           | Rate        | Y2 | .885    | .927    | .042      | .000  | 4.7%   |         |
|                               |                           | PMPM        | Y1 | \$1,613 | \$1,484 | -\$129    | .299  | -8.0%  |         |
|                               |                           | Expenditure | Y2 | \$1,635 | \$1,391 | -\$244    | .011  | -14.9% |         |
| <b>General medical</b>        | <b>Self-directed</b>      | Penetration | Y1 | .530    | .731    | .201      | .000  | 38.0%  |         |
|                               |                           | Rate        | Y2 | .539    | .695    | .156      | .000  | 29.0%  |         |
|                               |                           | PMPM        | Y1 | \$611   | \$552   | -\$58     | .536  | -9.5%  |         |
|                               |                           | Expenditure | Y2 | \$695   | \$540   | -\$155    | .036  | -22.2% |         |
|                               | <b>Provider-supported</b> | Penetration | Y1 | .498    | .761    | .263      | .000  | 52.9%  |         |
|                               |                           | Rate        | Y2 | .510    | .728    | .218      | .000  | 42.8%  |         |
|                               |                           | PMPM        | Y1 | \$634   | \$559   | -\$75     | .295  | -11.8% |         |
|                               |                           | Expenditure | Y2 | \$616   | \$601   | -\$15     | .766  | -2.4%  |         |
| <b>Behavioral health (BH)</b> | <b>Self-directed</b>      | Penetration | Y1 | .787    | .931    | .144      | .000  | 18.2%  |         |
|                               |                           | Rate        | Y2 | .744    | .856    | .112      | .000  | 15.0%  |         |
|                               |                           | PMPM        | Y1 | \$833   | \$699   | -\$134    | .079  | -16.1% |         |
|                               |                           | Expenditure | Y2 | \$894   | \$631   | -\$263    | .170  | -29.4% |         |
|                               | <b>Provider-supported</b> | Penetration | Y1 | .769    | .910    | .141      | .000  | 18.4%  |         |
|                               |                           | Rate        | Y2 | .720    | .819    | .098      | .000  | 13.7%  |         |
|                               |                           | PMPM        | Y1 | \$767   | \$669   | -\$98     | .352  | -12.7% |         |
|                               |                           | Expenditure | Y2 | \$758   | \$546   | -\$212    | .010  | -28.0% |         |
| <b>Pharmacy</b>               | <b>Self-directed</b>      | Penetration | Y1 | .752    | .583    | -.169     | .000  | -22.5% |         |
|                               |                           | Rate        | Y2 | .749    | .557    | -.192     | .000  | -25.7% |         |
|                               |                           | PMPM        | Y1 | \$258   | \$218   | -\$40     | .250  | -15.3% |         |
|                               |                           | Expenditure | Y2 | \$272   | \$209   | -\$63     | .000  | -23.1% |         |
|                               | <b>Provider-supported</b> | Penetration | Y1 | .713    | .536    | -.178     | .000  | -24.9% |         |
|                               |                           | Rate        | Y2 | .721    | .502    | -.219     | .000  | -30.4% |         |
|                               |                           | PMPM        | Y1 | \$226   | \$268   | \$42      | .016  | 18.7%  |         |
|                               |                           | Expenditure | Y2 | \$270   | \$256   | -\$15     | .766  | -5.4%  |         |
| <b>Inpatient</b>              | <b>Self-directed</b>      | Penetration | Y1 | .038    | .032    | -.006     | .142  | -15.0% |         |
|                               |                           | Rate        | Y2 | .040    | .027    | -.014     | .000  | -34.2% |         |
|                               |                           | PMPM        | Y1 | \$321   | \$320   | -\$1      | .983  | -0.4%  |         |
|                               |                           | Expenditure | Y2 | \$430   | \$241   | -\$189    | .035  | -43.9% |         |
|                               | <b>Provider-supported</b> | Penetration | Y1 | .031    | .024    | -.008     | .174  | -24.1% |         |

|                                   |                           |             |    |       |       |        |      |        |
|-----------------------------------|---------------------------|-------------|----|-------|-------|--------|------|--------|
|                                   |                           | Rate        | Y2 | .031  | .020  | -.011  | .000 | -36.3% |
|                                   |                           | PMPM        | Y1 | \$295 | \$214 | -\$81  | .338 | -27.5% |
|                                   |                           | Expenditure | Y2 | \$287 | \$221 | -\$66  | .018 | -23.0% |
| <b>Medical inpatient</b>          | <b>Self-directed</b>      | Penetration | Y1 | .018  | .032  | .014   | .000 | 74.7%  |
|                                   |                           | Rate        | Y2 | .021  | .025  | .004   | .142 | 18.6%  |
|                                   |                           | PMPM        | Y1 | \$154 | \$224 | \$70   | .108 | 45.8%  |
|                                   |                           | Expenditure | Y2 | \$197 | \$183 | -\$14  | .700 | -7.3%  |
|                                   | <b>Provider-supported</b> | Penetration | Y1 | .015  | .022  | .007   | .161 | 49.9%  |
|                                   |                           | Rate        | Y2 | .013  | .017  | .004   | .083 | 33.0%  |
|                                   |                           | PMPM        | Y1 | \$160 | \$161 | \$1    | .984 | 0.6%   |
|                                   |                           | Expenditure | Y2 | \$123 | \$139 | \$16   | .533 | 12.8%  |
| <b>Inpatient BH</b>               | <b>Self-directed</b>      | Penetration | Y1 | .022  | .022  | .000   | .992 | 0.2%   |
|                                   |                           | Rate        | Y2 | .022  | .016  | -.006  | .111 | -28.8% |
|                                   |                           | PMPM        | Y1 | \$167 | \$99  | -\$68  | .026 | -40.7% |
|                                   |                           | Expenditure | Y2 | \$233 | \$61  | -\$172 | .054 | -73.8% |
|                                   | <b>Provider-supported</b> | Penetration | Y1 | .016  | .011  | -.005  | .170 | -29.8% |
|                                   |                           | Rate        | Y2 | .018  | .011  | -.008  | .000 | -41.4% |
|                                   |                           | PMPM        | Y1 | \$133 | \$54  | -\$79  | .035 | -59.1% |
|                                   |                           | Expenditure | Y2 | \$161 | \$82  | -\$79  | .005 | -48.9% |
| <b>Emergency room<sup>a</sup></b> | <b>Self-directed</b>      | Penetration | Y1 | .127  | .161  | .034   | .000 | 26.7%  |
|                                   |                           | Rate        | Y2 | .141  | .150  | .009   | .504 | 6.5%   |
|                                   |                           | PMPM        | Y1 | \$78  | \$44  | -\$34  | .000 | -43.2% |
|                                   |                           | Expenditure | Y2 | \$96  | \$47  | -\$49  | .000 | -51.0% |
|                                   | <b>Provider-supported</b> | Penetration | Y1 | .117  | .127  | .010   | .532 | 8.2%   |
|                                   |                           | Rate        | Y2 | .116  | .127  | .011   | .420 | 9.6%   |
|                                   |                           | PMPM        | Y1 | \$73  | \$45  | -\$28  | .000 | -38.7% |
|                                   |                           | Expenditure | Y2 | \$79  | \$44  | -\$35  | .000 | -44.4% |
| <b>Total case management</b>      | <b>Self-directed</b>      | Penetration | Y1 | .564  | .755  | .191   | .001 | 33.9%  |
|                                   |                           | Rate        | Y2 | .532  | .654  | .122   | .067 | 23.0%  |
|                                   |                           | PMPM        | Y1 | \$177 | \$236 | \$59   | .012 | 33.3%  |
|                                   |                           | Expenditure | Y2 | \$171 | \$217 | \$45   | .058 | 26.4%  |
|                                   | <b>Provider-supported</b> | Penetration | Y1 | .576  | .714  | .137   | .002 | 23.9%  |
|                                   |                           | Rate        | Y2 | .532  | .576  | .044   | .490 | 8.3%   |
|                                   |                           | PMPM        | Y1 | \$173 | \$194 | \$20   | .172 | 11.8%  |
|                                   |                           | Expenditure | Y2 | \$165 | \$137 | -\$28  | .041 | -16.9% |

<sup>a</sup> Matched cohort is not comparable to intervention groups for ER analysis and results thus are not applicable.

The year 1 medical inpatient utilization rate coefficient (+75%\*\*) for the self-directed

approach is the result of an anomalous drop in the year 1 comparison cohort group medical inpatient utilization. In Year 2, the comparison cohort penetration rate returned to a level close to its baseline year value, while the self-directed cohort continued to drop. By year 2, the self-directed cohort medical inpatient utilization fell by 34% relative to its baseline year level, while its matched cohort dropped by 11% over the same period; however, this difference was not statistically significant.

**Difference in utilization and costs over time within treatment and control arms**

|                               |                           |                  |         | Baseline | Year 1  | Year 2  | Year 1 -<br>baseline | Year 2 -<br>baseline |
|-------------------------------|---------------------------|------------------|---------|----------|---------|---------|----------------------|----------------------|
| <b>Total cost</b>             | <b>Self-directed</b>      | Penetration Rate | Est.    | 0.965    | 0.974   | 0.936   | 0.008                | -0.029               |
|                               |                           |                  | p       |          |         |         | 0.066                | 0.000                |
|                               |                           |                  | Diff. % |          |         |         | 0.9%                 | -3.0%                |
|                               |                           | PMPM Expenditure | Est.    | \$2,144  | \$2,186 | \$1,969 | \$42                 | -\$175               |
|                               |                           |                  | p       |          |         |         | 0.579                | 0.023                |
|                               |                           | Diff. %          |         |          |         | 2.0%    | -8.2%                |                      |
|                               | <b>Provider-supported</b> | Penetration Rate | Est.    | 0.968    | 0.965   | 0.925   | -0.003               | -0.043               |
|                               |                           |                  | p       |          |         |         | 0.373                | 0.000                |
|                               |                           |                  | Diff. % |          |         |         | -0.3%                | -4.4%                |
|                               |                           | PMPM Expenditure | Est.    | \$2,060  | \$2,072 | \$1,810 | \$12                 | -\$251               |
| p                             |                           |                  |         |          |         | 0.838   | 0.000                |                      |
|                               | Diff. %                   |                  |         |          | 0.6%    | -12.2%  |                      |                      |
| <b>General medical</b>        | <b>Self-directed</b>      | Penetration Rate | Est.    | 0.648    | 0.746   | 0.704   | 0.098                | 0.056                |
|                               |                           |                  | p       |          |         |         | 0.000                | 0.000                |
|                               |                           |                  | Diff. % |          |         |         | 15.1%                | 8.6%                 |
|                               |                           | PMPM Expenditure | Est.    | \$652    | \$618   | \$596   | -\$34                | -\$56                |
|                               |                           |                  | p       |          |         |         | 0.530                | 0.318                |
|                               |                           | Diff. %          |         |          |         | -5.2%   | -8.5%                |                      |
|                               | <b>Provider-supported</b> | Penetration Rate | Est.    | 0.617    | 0.756   | 0.719   | 0.138                | 0.101                |
|                               |                           |                  | p       |          |         |         | 0.000                | 0.000                |
|                               |                           |                  | Diff. % |          |         |         | 22.4%                | 16.4%                |
|                               |                           | PMPM Expenditure | Est.    | \$500    | \$497   | \$544   | -\$3                 | \$44                 |
| p                             |                           |                  |         |          |         | 0.935   | 0.247                |                      |
|                               | Diff. %                   |                  |         |          | -0.6%   | 8.9%    |                      |                      |
| <b>Behavioral health (BH)</b> | <b>Self-directed</b>      | Penetration Rate | Est.    | 0.891    | 0.932   | 0.850   | 0.042                | -0.041               |
|                               |                           |                  | p       |          |         |         | 0.000                | 0.000                |

|                  |                           |                  |         |         |         |         |        |        |
|------------------|---------------------------|------------------|---------|---------|---------|---------|--------|--------|
|                  |                           |                  | Diff. % |         |         |         | 4.7%   | -4.6%  |
|                  |                           |                  | Est.    | \$1,268 | \$1,333 | \$1,146 | \$65   | -\$122 |
|                  |                           | PMPM Expenditure | p       |         |         |         | 0.154  | 0.009  |
|                  |                           |                  | Diff. % |         |         |         | 5.1%   | -9.6%  |
|                  | <b>Provider-supported</b> |                  |         |         |         |         |        |        |
|                  |                           | Penetration Rate | Est.    | 0.922   | 0.912   | 0.820   | -0.010 | -0.103 |
|                  |                           |                  | p       |         |         |         | 0.088  | 0.000  |
|                  |                           |                  | Diff. % |         |         |         | -1.0%  | -11.1% |
|                  |                           |                  | Est.    | \$1,375 | \$1,326 | \$1,030 | -\$50  | -\$346 |
|                  |                           | PMPM Expenditure | p       |         |         |         | 0.183  | 0.000  |
|                  |                           |                  | Diff. % |         |         |         | -3.6%  | -25.1% |
| <b>Pharmacy</b>  | <b>Self-directed</b>      |                  |         |         |         |         |        |        |
|                  |                           | Penetration Rate | Est.    | 0.599   | 0.578   | 0.551   | -0.021 | -0.048 |
|                  |                           |                  | p       |         |         |         | 0.009  | 0.000  |
|                  |                           |                  | Diff. % |         |         |         | -3.5%  | -8.0%  |
|                  |                           |                  | Est.    | \$225   | \$236   | \$226   | \$11   | \$2    |
|                  |                           | PMPM Expenditure | p       |         |         |         | 0.426  | 0.899  |
|                  |                           |                  | Diff. % |         |         |         | 5.0%   | 0.8%   |
|                  | <b>Provider-supported</b> |                  |         |         |         |         |        |        |
|                  |                           | Penetration Rate | Est.    | 0.549   | 0.507   | 0.477   | -0.041 | -0.071 |
|                  |                           |                  | p       |         |         |         | 0.000  | 0.000  |
|                  |                           |                  | Diff. % |         |         |         | -7.5%  | -13.0% |
|                  |                           |                  | Est.    | \$185   | \$250   | \$236   | \$65   | \$50   |
|                  |                           | PMPM Expenditure | p       |         |         |         | 0.000  | 0.004  |
|                  |                           |                  | Diff. % |         |         |         | 34.8%  | 27.2%  |
| <b>Inpatient</b> | <b>Self-directed</b>      |                  |         |         |         |         |        |        |
|                  |                           | Penetration Rate | Est.    | 0.039   | 0.034   | 0.028   | -0.005 | -0.011 |
|                  |                           |                  | p       |         |         |         | 0.281  | 0.018  |
|                  |                           |                  | Diff. % |         |         |         | -12.5% | -28.1% |
|                  |                           |                  | Est.    | \$369   | \$354   | \$272   | -\$15  | -\$97  |
|                  |                           | PMPM Expenditure | p       |         |         |         | 0.790  | 0.088  |
|                  |                           |                  | Diff. % |         |         |         | -4.0%  | -26.2% |
|                  | <b>Provider-supported</b> |                  |         |         |         |         |        |        |
|                  |                           | Penetration Rate | Est.    | 0.028   | 0.023   | 0.019   | -0.004 | -0.009 |
|                  |                           |                  | p       |         |         |         | 0.185  | 0.010  |
|                  |                           |                  | Diff. % |         |         |         | -16.2% | -32.3% |

|                          |                           |                  |         |       |       |       |        |        |
|--------------------------|---------------------------|------------------|---------|-------|-------|-------|--------|--------|
|                          |                           |                  | Est.    | \$213 | \$203 | \$206 | -\$10  | -\$7   |
|                          |                           | PMPM Expenditure | p       |       |       |       | 0.802  | 0.867  |
|                          |                           |                  | Diff. % |       |       |       | -4.8%  | -3.3%  |
| <b>Medical inpatient</b> | <b>Self-directed</b>      | Penetration Rate | Est.    | 0.038 | 0.034 | 0.026 | -0.004 | -0.012 |
|                          |                           |                  | p       |       |       |       | 0.302  | 0.002  |
|                          |                           |                  | Diff. % |       |       |       | -10.4% | -31.8% |
|                          |                           | PMPM Expenditure | Est.    | \$246 | \$244 | \$201 | -\$2   | -\$45  |
|                          |                           |                  | p       |       |       |       | 0.952  | 0.241  |
|                          |                           |                  | Diff. % |       |       |       | -0.9%  | -18.3% |
|                          | <b>Provider-supported</b> | Penetration Rate | Est.    | 0.025 | 0.022 | 0.017 | -0.003 | -0.008 |
|                          |                           |                  | p       |       |       |       | 0.187  | 0.002  |
|                          |                           |                  | Diff. % |       |       |       | -13.4% | -32.3% |
|                          |                           | PMPM Expenditure | Est.    | \$161 | \$160 | \$142 | -\$1   | -\$20  |
|                          |                           |                  | p       |       |       |       | 0.957  | 0.438  |
|                          |                           |                  | Diff. % |       |       |       | -0.8%  | -12.2% |
| <b>Inpatient BH</b>      | <b>Self-directed</b>      | Penetration Rate | Est.    | 0.027 | 0.022 | 0.016 | -0.005 | -0.011 |
|                          |                           |                  | p       |       |       |       | 0.174  | 0.003  |
|                          |                           |                  | Diff. % |       |       |       | -17.9% | -39.8% |
|                          |                           | PMPM Expenditure | Est.    | \$123 | \$110 | \$71  | -\$12  | -\$52  |
|                          |                           |                  | p       |       |       |       | 0.725  | 0.156  |
|                          |                           |                  | Diff. % |       |       |       | -10.2% | -42.0% |
|                          | <b>Provider-supported</b> | Penetration Rate | Est.    | 0.014 | 0.011 | 0.009 | -0.003 | -0.005 |
|                          |                           |                  | p       |       |       |       | 0.194  | 0.085  |
|                          |                           |                  | Diff. % |       |       |       | -24.3% | -32.8% |
|                          |                           | PMPM Expenditure | Est.    | \$52  | \$43  | \$64  | -\$9   | \$13   |
|                          |                           |                  | p       |       |       |       | 0.768  | 0.677  |
|                          |                           |                  | Diff. % |       |       |       | -17.1% | 24.7%  |
| <b>Emergency room</b>    | <b>Self-directed</b>      | Penetration Rate | Est.    | 0.164 | 0.150 | 0.141 | -0.014 | -0.024 |
|                          |                           |                  | p       |       |       |       | 0.075  | 0.004  |
|                          |                           |                  | Diff. % |       |       |       | -8.6%  | -14.4% |
|                          |                           | PMPM             | Est.    | \$42  | \$36  | \$39  | -\$7   | -\$3   |

|                              |                           |                  |         |       |       |        |        |        |
|------------------------------|---------------------------|------------------|---------|-------|-------|--------|--------|--------|
|                              |                           | Expenditure      |         |       |       | 0.432  | 0.727  |        |
|                              |                           |                  | p       |       |       |        |        |        |
|                              |                           |                  | Diff. % |       |       | -15.5% | -7.1%  |        |
|                              | <b>Provider-supported</b> |                  |         |       |       |        |        |        |
|                              |                           | Penetration Rate | Est.    | 0.114 | 0.108 | 0.107  | -0.006 | -0.006 |
|                              |                           |                  | p       |       |       |        |        |        |
|                              |                           |                  | Diff. % |       |       |        |        |        |
|                              |                           |                  | Est.    | \$29  | \$30  | \$29   | \$1    | \$0    |
|                              |                           | PMPM Expenditure | p       |       |       |        |        |        |
|                              |                           |                  | Diff. % |       |       |        |        |        |
|                              |                           |                  |         |       |       | 0.849  | 0.934  |        |
|                              |                           |                  |         |       |       | 2.9%   | -1.3%  |        |
| <b>Total case management</b> | <b>Self-directed</b>      |                  |         |       |       |        |        |        |
|                              |                           | Penetration Rate | Est.    | 0.686 | 0.763 | 0.657  | 0.078  | -0.028 |
|                              |                           |                  | p       |       |       |        |        |        |
|                              |                           |                  | Diff. % |       |       |        |        |        |
|                              |                           |                  | Est.    | \$272 | \$350 | \$312  | \$78   | \$40   |
|                              |                           | PMPM Expenditure | p       |       |       |        |        |        |
|                              |                           |                  | Diff. % |       |       |        |        |        |
|                              |                           |                  |         |       |       | 0.000  | 0.002  |        |
|                              |                           |                  |         |       |       | 11.4%  | -4.1%  |        |
|                              |                           |                  |         |       |       | 0.000  | 0.000  |        |
|                              |                           |                  |         |       |       | 28.8%  | 14.8%  |        |
|                              | <b>Provider-Supported</b> |                  |         |       |       |        |        |        |
|                              |                           | Penetration Rate | Est.    | 0.731 | 0.728 | 0.592  | -0.004 | -0.139 |
|                              |                           |                  | p       |       |       |        |        |        |
|                              |                           |                  | Diff. % |       |       |        |        |        |
|                              |                           |                  | Est.    | \$297 | \$306 | \$222  | \$9    | -\$75  |
|                              |                           | PMPM Expenditure | p       |       |       |        |        |        |
|                              |                           |                  | Diff. % |       |       |        |        |        |
|                              |                           |                  |         |       |       | 0.045  | 0.000  |        |
|                              |                           |                  |         |       |       | 3.2%   | -25.4% |        |

PMPM = per-member-per-month cost

**Analysis of covariance of utilization and costs between self-directed and provider-supported cohorts adjusting for baseline outcome**

|                               |             |    | <b>Self-directed</b> | <b>Provider-supported</b> | <b>Diff.</b> | <b>p</b> | <b>Diff. %</b> |
|-------------------------------|-------------|----|----------------------|---------------------------|--------------|----------|----------------|
| <b>Total</b>                  | Penetration | Y1 | .971                 | .965                      | -.005        | .532     | -0.6%          |
|                               | Rate        | Y2 | .936                 | .929                      | -.006        | .564     | -0.7%          |
|                               | PMPM        | Y1 | \$2,223              | \$2,100                   | -\$123       | .497     | -5.5%          |
|                               | Expenditure | Y2 | \$2,031              | \$1,838                   | -\$193       | .128     | -9.5%          |
| <b>General medical</b>        | Penetration | Y1 | .732                 | .762                      | .030         | .096     | 4.1%           |
|                               | Rate        | Y2 | .689                 | .725                      | .036         | .156     | 5.3%           |
|                               | PMPM        | Y1 | \$634                | \$529                     | -\$105       | .160     | -16.6%         |
|                               | Expenditure | Y2 | \$600                | \$544                     | -\$56        | .327     | -9.3%          |
| <b>Behavioral health (BH)</b> | Penetration | Y1 | .934                 | .910                      | -.023        | .153     | -2.5%          |
|                               | Rate        | Y2 | .862                 | .820                      | -.042        | .146     | -4.9%          |
|                               | PMPM        | Y1 | \$1,348              | \$1,327                   | -\$21        | .864     | -1.6%          |
|                               | Expenditure | Y2 | \$1,206              | nh\$1,059                 | -\$147       | .167     | -12.2%         |
| <b>Pharmacy</b>               | Penetration | Y1 | .559                 | .520                      | -.039        | .333     | -7.0%          |
|                               | Rate        | Y2 | .533                 | .490                      | -.043        | .360     | -8.0%          |
|                               | PMPM        | Y1 | \$449                | \$556                     | \$108        | .037     | 24.0%          |
|                               | Expenditure | Y2 | \$452                | \$551                     | \$100        | .207     | 22.0%          |
| <b>Inpatient</b>              | Penetration | Y1 | .032                 | .026                      | -.006        | .212     | -19.8%         |
|                               | Rate        | Y2 | .027                 | .021                      | -.006        | .032     | -23.3%         |
|                               | PMPM        | Y1 | \$322                | \$228                     | -\$94        | .108     | -29.2%         |
|                               | Expenditure | Y2 | \$281                | \$219                     | -\$62        | .133     | -22.1%         |
| <b>Medical inpatient</b>      | Penetration | Y1 | .031                 | .024                      | -.007        | .115     | -23.4%         |
|                               | Rate        | Y2 | .025                 | .018                      | -.007        | .001     | -28.3%         |
|                               | PMPM        | Y1 | \$230                | \$175                     | -\$55        | .142     | -24.1%         |
|                               | Expenditure | Y2 | \$203                | \$149                     | -\$54        | .012     | -26.4%         |
| <b>Inpatient BH</b>           | Penetration | Y1 | .021                 | .012                      | -.009        | .016     | -44.3%         |
|                               | Rate        | Y2 | .015                 | .011                      | -.004        | .198     | -25.4%         |
|                               | PMPM        | Y1 | \$107                | \$70                      | -\$37        | .254     | -34.4%         |
|                               | Expenditure | Y2 | \$75                 | \$85                      | \$9          | .793     | 12.5%          |
| <b>Emergency room</b>         | Penetration | Y1 | .139                 | .115                      | -.024        | .058     | -17.2%         |
|                               | Rate        | Y2 | .131                 | .114                      | -.017        | .180     | -12.6%         |
|                               | PMPM        | Y1 | \$44                 | \$36                      | -\$8         | .088     | -18.7%         |
|                               | Expenditure | Y2 | \$46                 | \$37                      | -\$9         | .087     | -19.0%         |
| <b>Total case management</b>  | Penetration | Y1 | .776                 | .722                      | -.054        | .425     | -7.0%          |
|                               | Rate        | Y2 | .684                 | .587                      | -.097        | .248     | -14.2%         |
|                               | PMPM        | Y1 | \$365                | \$297                     | -\$68        | .023     | -18.7%         |
|                               | Expenditure | Y2 | \$332                | \$222                     | -\$110       | .002     | -33.1%         |



PMPM = per-member-per-month cost
